# Supplementary material for: Inflammation and cytomegalovirus viremia during pregnancy drive sex-differentiated differences in mortality and immune development in HIV-exposed infants
Source: PubMed Central journal article supplement (PMC11024190; doi:10.1038/s41467-023-44166-2), 2024-04-17
Supplement: 41467_2023_44166_MOESM1_ESM.pdf [file 41467_2023_44166_MOESM1_ESM.pdf]

**Supplementary Table 1. Maternal, household, and infant baseline characteristics.**

| <b>Baseline characteristics<sup>1</sup></b> | <b>HIV-exposed</b> | <b>HIV-unexposed</b> | <b><i>P</i></b> |
|---------------------------------------------|--------------------|----------------------|-----------------|
| Mothers [N]                                 | 726                | 3937                 |                 |
| Infants [N]                                 | 738                | 3989                 |                 |
| <b>Trial arm<sup>2</sup></b>                |                    |                      | 0.17            |
| SOC                                         | 166/738 (22%)      | 960/3989 (24%)       |                 |
| IYCF                                        | 158/738 (21%)      | 963/3989 (24%)       |                 |
| WASH                                        | 205/738 (28%)      | 996/3989 (25%)       |                 |
| IYCF+WASH                                   | 209/738 (28%)      | 1070/3989 (27%)      |                 |
| <b>Household characteristics</b>            |                    |                      |                 |
| Size; median (IQR)                          | 4 (3, 6)           | 5 (3, 6)             | <0.001          |
| Wealth quintile: <sup>3</sup>               |                    |                      | <0.001          |
| Lowest                                      | 191/712 (27%)      | 680/3659 (19%)       |                 |

|         |               |                |
|---------|---------------|----------------|
| Second  | 167/712 (23%) | 706/3659 (19%) |
| Middle  | 136/712 (19%) | 743/3659 (20%) |
| Fourth  | 106/712 (15%) | 767/3659 (21%) |
| Highest | 112/712 (16%) | 763/3659 (21%) |

### Maternal characteristics

|                                       |               |                 |        |
|---------------------------------------|---------------|-----------------|--------|
| Age, years; mean (SD)                 | 29.2 (6.3)    | 25.6 (6.6)      | <0.001 |
| Height, cm; mean (SD)                 | 160.2 (6.2)   | 160.1 (5.8)     | 0.84   |
| MUAC, cm; mean (SD)                   | 26.2 (2.9)    | 26.4 (3.1)      | 0.17   |
| Completed schooling, years; mean (SD) | 9.1 (2.1)     | 9.6 (1.8)       | <0.001 |
| Parity; median (IQR)                  | 2 (1, 3)      | 2 (1, 3)        | <0.001 |
| Married                               | 643/682 (94%) | 3546/3717 (95%) | 0.27   |
| Employed                              | 67/710 (9%)   | 311/3655 (9%)   | 0.38   |
| Religion:                             |               |                 | 0.13   |
| Apostolic                             | 330/726 (45%) | 1762/3937 (45%) |        |

|                                                          |               |                 |
|----------------------------------------------------------|---------------|-----------------|
| Other Christian religions                                | 288/726 (40%) | 1685/3937 (43%) |
| Other non-Christian religions                            | 108/726 (15%) | 490/3937 (12%)  |
| HIV disease severity and treatment:                      |               |                 |
| CD4 count in pregnancy, cells/uL; mean (SD) <sup>4</sup> | 473.6 (221)   | N/A             |
| CD4 count <200 cells/uL                                  | 46/613 (8%)   | N/A             |
| Co-trimoxazole prophylaxis during pregnancy <sup>5</sup> | 402/726 (55%) | N/A             |
| Antiretroviral therapy during pregnancy <sup>6</sup>     | 604/726 (83%) | N/A             |
| Tenofovir-based ART regimen                              | 397/604 (66%) | N/A             |
| Zidovudine-based ART regimen                             | 120/604 (20%) | N/A             |
| Other/unknown regimen <sup>7</sup>                       | 87/604 (14%)  | N/A             |

### Infant characteristics

|                             |               |                 |        |
|-----------------------------|---------------|-----------------|--------|
| Female                      | 367/733 (50%) | 1962/3974 (49%) | 0.73   |
| Birth weight, kg; mean (SD) | 2.99 (0.50)   | 3.08 (0.50)     | <0.001 |
| Birth weight <2500 g        | 84/651 (13%)  | 326/3574 (9%)   | 0.004  |

|                        |               |                 |       |
|------------------------|---------------|-----------------|-------|
| Institutional delivery | 544/649 (84%) | 3208/3604 (89%) | 0.001 |
| Vaginal delivery       | 610/659 (93%) | 3411/3664 (93%) | 0.64  |

---

<sup>1</sup> Baseline for mothers was 2 weeks after consent (~14 weeks gestation). Baseline for infants was at birth. Values are %, unless stated.

<sup>2</sup> SOC = standard of care; IYCF = infant and young child feeding; WASH = water and sanitation/hygiene.

<sup>3</sup> Wealth index constructed as described in (1).

<sup>4</sup> CD4 count at baseline visit, or at 32 gestational week visit if no baseline result.

<sup>5</sup> Documented exposure to co-trimoxazole during pregnancy.

<sup>6</sup> Documented exposure to antiretroviral therapy during pregnancy.

<sup>7</sup> Includes non-tenofovir- or zidovudine-based regimens, use of both tenofovir and zidovudine during pregnancy (including switching regimens), or undocumented antiretroviral therapy regimen.

SD: standard deviation; IQR: interquartile range; MUAC: mid-upper arm circumference.

**Supplementary Table 2. Differences between median fluorescent intensities of CD40, CD86 and HLA-DR in monocyte subset between HEU and HIV-unexposed children at 1 month of age.**

| Monocyte marker, median fluorescent intensity | Mean (95%CI)                     |                                  | Adjusted difference*         | P     |
|-----------------------------------------------|----------------------------------|----------------------------------|------------------------------|-------|
|                                               | HIV-exposed uninfected           | HIV-unexposed                    |                              |       |
| Classical monocyte CD40                       | 6465.31 (6047.16, 6883.45)       | 6870.04 (6422.75, 7317.32)       | -484.60 (-1023.74, 54.54)    | 0.078 |
| Classical monocyte CD86                       | 5205.29 (4767.28, 5643.29)       | 5430.24 (4736.53, 6123.95)       | -281.57 (-1060.07, 496.93)   | 0.478 |
| Classical monocyte HLA-DR                     | 11 023.51 (9479.10, 12 567.92)   | 9917.15 (8612.45, 11 221.86)     | 1209.39 (-736.33, 3155.11)   | 0.223 |
| Intermediate monocyte CD40                    | 4142.83 (3871.74, 4414.92)       | 4155.45 (3852.22, 4458.69)       | -42.82 (-439.02, 353.38)     | 0.832 |
| Intermediate monocyte CD86                    | 4483.77 (4146.56, 4820.98)       | 4413.98 (4009.08, 4818.88)       | 52.40 (-446.52, 551.33)      | 0.837 |
| Intermediate monocyte HLA-DR                  | 14 018.61 (12 214.84, 15 822.40) | 12 351.40 (10 739.57, 13 963.24) | 1654.3 (-594.35, 3903.00)    | 0.149 |
| Non-classical monocyte CD40                   | 2550.46 (2357.64, 2743.27)       | 4984.31 (86.68, 9881.95)         | -2497.59 (-7395.49, 2400.31) | 0.318 |
| Non-classical monocyte CD86                   | 2730.67 (2503.87, 4820.98)       | 2639.12 (2391.76, 2886.50)       | 102.60 (-219.75, 424.96)     | 0.533 |
| Non-classical monocyte HLA-DR                 | 9061.48 (7710.73, 10 412.23)     | 8163.29 (7115.91, 9210.66)       | 841.69 (-709.27, 2392.66)    | 0.287 |

Compared using linear regression models, fitted by generalised estimating equations with an exchangeable correlation to account for cluster. All statistical tests are two-sided, and presented P-values have not been adjusted for multiple comparisons.

\*Adjusted for infant sex, exact age at time of blood collection, and randomised trial arm.

**Supplementary Table 3. Association between second and third trimester HIV viral load in mothers living with HIV and T-cell and monocyte immunophenotyping of HIV children at 1 month of age.**

|                                                                | Second trimester               |       |                               |       | Third trimester                |       |                               |       |
|----------------------------------------------------------------|--------------------------------|-------|-------------------------------|-------|--------------------------------|-------|-------------------------------|-------|
|                                                                | Unadjusted coefficient (95%CI) | P     | Adjusted* coefficient (95%CI) | P     | Unadjusted coefficient (95%CI) | P     | Adjusted* coefficient (95%CI) | P     |
| Naïve CD8 <sup>+</sup> T-cells                                 | 0.02 (-0.10, 0.15)             | 0.746 | 0.00 (-0.13, 0.13)            | 0.998 | -0.11 (-0.27, 0.05)            | 0.195 | -0.12 (-0.29, 0.06)           | 0.187 |
| Central memory CD8 <sup>+</sup> T-cells                        | 0.03 (-0.09, 0.15)             | 0.647 | 0.06 (-0.06, 0.18)            | 0.353 | 0.09 (-0.07, 0.26)             | 0.263 | 0.11 (-0.05, 0.28)            | 0.182 |
| Effector memory CD8 <sup>+</sup> T-cells                       | -0.08 (-0.22, 0.05)            | 0.223 | -0.06 (-0.20, 0.07)           | 0.358 | 0.02 (-0.13, 0.17)             | 0.758 | 0.03 (-0.12, 0.19)            | 0.697 |
| TEMRA CD8 <sup>+</sup> T-cells                                 | -0.05 (-0.16, 0.05)            | 0.342 | -0.06 (-0.16, 0.05)           | 0.299 | 0.09 (-0.02, 0.20)             | 0.092 | 0.08 (-0.03, 0.19)            | 0.166 |
| CD28 <sup>+</sup> CD57 <sup>-</sup> CD8 <sup>+</sup> T-cells   | 0.02 (-0.08, 0.12)             | 0.719 | -0.01 (-0.11, 0.09)           | 0.843 | -0.11 (-0.24, 0.03)            | 0.117 | -0.13 (-0.28, 0.10)           | 0.068 |
| CD28 <sup>-</sup> CD57 <sup>+</sup> CD8 <sup>+</sup> T-cells   | 0.00 (-0.10, 0.11)             | 0.950 | 0.02 (-0.09, 0.13)            | 0.744 | 0.16 (0.03, 0.29)              | 0.015 | 0.17 (0.04, 0.29)             | 0.010 |
| PD-1 <sup>+</sup> CD8 <sup>+</sup> T-cells                     | 0.03 (-0.07, 0.13)             | 0.552 | 0.04 (-0.06, 0.15)            | 0.430 | 0.10 (-0.02, 0.22)             | 0.117 | 0.11 (-0.02, 0.23)            | 0.096 |
| CD38 <sup>+</sup> HLA-DR <sup>+</sup> CD8 <sup>+</sup> T-cells | 0.00 (-0.12, 0.12)             | 0.964 | 0.09 (-0.04, 0.21)            | 0.170 | 0.16 (0.03, 0.29)              | 0.015 | 0.17 (0.04, 0.29)             | 0.010 |
| Ki67 <sup>+</sup> CD8 <sup>+</sup> T-cells                     | 0.05 (-0.07, 0.18)             | 0.419 | 0.05 (-0.07, 0.17)            | 0.431 | 0.10 (-0.02, 0.22)             | 0.117 | 0.11 (-0.02, 0.23)            | 0.096 |
| Classical monocytes                                            | 0.03 (-0.03, 0.08)             | 0.311 | 0.02 (-0.04, 0.07)            | 0.537 | 0.10 (-0.07, 0.26)             | 0.244 | 0.12 (-0.05, 0.29)            | 0.167 |
| Intermediate monocytes                                         | 0.01 (-0.05, 0.07)             | 0.674 | 0.02 (-0.04, 0.08)            | 0.527 | 0.04 (-0.15, 0.22)             | 0.698 | 0.06 (-0.13, 0.24)            | 0.557 |
| Non-classical monocytes                                        | -0.04 (-0.11, 0.03)            | 0.229 | -0.03 (-0.10, 0.04)           | 0.353 | 0.06 (-0.02, 0.14)             | 0.138 | 0.05 (-0.03, 0.13)            | 0.260 |

Compared using fractional regression. All statistical tests are two-sided, and presented P-values have not been adjusted for multiple comparisons.

\*Adjusted for gestational age at time of maternal blood sampling, exact infant age in days at time of infant blood sampling, infant sex, randomised trial arm.

**Supplementary Table 4. Spearman correlations between maternal and infant CD8<sup>+</sup> T-cell and monocyte immunophenotypes.**

| Cellular phenotype                                      | HIV-exposed uninfected |          | HIV-unexposed       |          |
|---------------------------------------------------------|------------------------|----------|---------------------|----------|
|                                                         | Spearman <i>rho</i>    | <i>P</i> | Spearman <i>rho</i> | <i>P</i> |
| CD8 <sup>+</sup> naïve                                  | 0.26                   | 0.028    | -0.04               | 0.777    |
| CD8 <sup>+</sup> central memory                         | 0.15                   | 0.218    | 0.16                | 0.225    |
| CD8 <sup>+</sup> effector memory                        | 0.21                   | 0.088    | 0.00                | 0.978    |
| CD8 <sup>+</sup> TEMRA                                  | 0.16                   | 0.190    | 0.05                | 0.682    |
| CD8 <sup>+</sup> CD38 <sup>+</sup> /HLA-DR <sup>+</sup> | 0.24                   | 0.025    | 0.22                | 0.062    |
| CD8 <sup>+</sup> Ki67 <sup>+</sup>                      | 0.29                   | 0.008    | -0.04               | 0.715    |
| CD8 <sup>+</sup> CD28 <sup>+</sup> /CD57 <sup>-</sup>   | 0.31                   | 0.003    | 0.04                | 0.731    |
| CD8 <sup>+</sup> CD28 <sup>-</sup> /CD57 <sup>+</sup>   | 0.25                   | 0.021    | 0.10                | 0.382    |
| CD8 <sup>+</sup> PD-1 <sup>+</sup>                      | 0.07                   | 0.526    | 0.20                | 0.080    |
| Classical monocyte                                      | -0.13                  | 0.275    | -0.12               | 0.341    |
| Intermediate monocyte                                   | -0.02                  | 0.853    | 0.19                | 0.110    |



Non-classical monocyte

-0.03

0.815

0.00

1.00

**Supplementary Table 5. Early CMV acquisition by HIV and CMV exposure**

| Exposure             | Exposed     | Unexposed    | Odds ratio (95%CI) | <i>P</i> | Adjusted odds ratio (95%CI) | <i>P</i> |
|----------------------|-------------|--------------|--------------------|----------|-----------------------------|----------|
| HIV                  | 66/89 (74%) | 48/100 (48%) | 3.14 (1.63, 6.06)  | 0.001    | 3.00 (1.56, 5.76)*          | 0.001    |
| Second trimester CMV | 36/47 (77%) | 72/132 (55%) | 2.71 (1.22, 6.00)  | 0.014    | 1.41 (0.51, 3.87)**         | 0.510    |
| Third trimester CMV  | 22/27 (81%) | 57/104 (55)  | 3.61 (1.21, 10.76) | 0.021    | 3.42 (1.13, 10.35)**        | 0.015    |

Compared using logistic regression. All statistical tests are two-sided, and presented P-values have not been adjusted for multiple comparisons.

\*Adjusted for exact infant age at timing of saliva sample, infant sex, and randomised trial arm.

\*\*Adjusted for maternal HIV, exact infant age at timing of saliva sample, infant sex, and randomised trial arm.

**Supplementary Table 6. Differences in T-cell and monocyte phenotypes in HIV-unexposed children with and without early CMV acquisition.**

|                                                                | Mean percentage (95%CI)      |                              | Unadjusted coefficient (95%CI) | P     | Adjusted* coefficient (95%CI) | P     |
|----------------------------------------------------------------|------------------------------|------------------------------|--------------------------------|-------|-------------------------------|-------|
|                                                                | Early CMV acquisition (N=33) | CMV negative 3 months (N=39) |                                |       |                               |       |
| Naïve CD8 <sup>+</sup> T-cells                                 | 88.71 (83.94, 93.48)         | 93.67 (90.38, 96.95)         | -0.32 (-0.66, 0.03)            | 0.072 | -0.36 (-0.67, -0.05)          | 0.025 |
| Central memory CD8 <sup>+</sup> T-cells                        | 7.04 (4.13, 9.94)            | 4.47 (2.77, 6.17)            | 0.23 (-0.04, 0.49)             | 0.096 | 0.22 (-0.01, 0.45)            | 0.059 |
| Effector memory CD8 <sup>+</sup> T-cells                       | 1.31 (0.24, 2.39)            | 0.34 (-0.03, 0.71)           | 0.49 (0.03, 0.94)              | 0.038 | 0.48 (-0.10, 0.86)            | 0.014 |
| TEMRA CD8 <sup>+</sup> T-cells                                 | 2.95 (1.04, 4.86)            | 1.52 (-0.37, 3.42)           | 0.28 (-0.27, 0.82)             | 0.319 | 0.54 (0.11, 0.97)             | 0.015 |
| CD28 <sup>+</sup> CD57 <sup>-</sup> CD8 <sup>+</sup> T-cells   | 89.03 (84.53, 93.54)         | 91.33 (86.86, 95.81)         | -0.13 (-0.49, 0.22)            | 0.462 | -0.15 (-0.49, 0.20)           | 0.403 |
| CD28 <sup>-</sup> CD57 <sup>+</sup> CD8 <sup>+</sup> T-cells   | 3.32 (1.48, 5.16)            | 2.29 (0.47, 4.11)            | 0.16 (-0.24, 0.56)             | 0.429 | 0.15 (-0.23, 0.54)            | 0.426 |
| PD-1 <sup>+</sup> CD8 <sup>+</sup> T-cells                     | 3.69 (1.37, 6.01)            | 2.80 (0.85, 4.74)            | 0.12 (-0.28, 0.52)             | 0.544 | 0.13 (-0.24, 0.50)            | 0.502 |
| CD38 <sup>+</sup> HLA-DR <sup>+</sup> CD8 <sup>+</sup> T-cells | 7.40 (4.18, 10.61)           | 3.30 (1.31, 5.29)            | 0.39 (0.05, 0.73)              | 0.024 | 0.47 (0.17, 0.77)             | 0.002 |
| Ki67 <sup>+</sup> CD8 <sup>+</sup> T-cells                     | 10.95 (5.99, 15.90)          | 5.94 (3.26, 8.62)            | 0.33 (0.00, 0.66)              | 0.052 | 0.36 (0.05, 0.66)             | 0.021 |
| Classical monocytes                                            | 61.86 (55.37, 68.35)         | 59.67 (54.38, 64.95)         | 0.06 (-0.15, 0.27)             | 0.591 | 0.07 (-0.13, 0.28)            | 0.484 |
| Intermediate monocytes                                         | 13.12 (9.82, 16.42)          | 10.97 (8.79, 13.14)          | 0.11 (-0.08, 0.29)             | 0.254 | 0.11 (-0.06, 0.28)            | 0.217 |
| Non-classical monocytes                                        | 25.02 (17.81, 32.23)         | 29.37 (24.24, 34.50)         | -0.13 (-0.39, 0.13)            | 0.320 | -0.15 (-0.40, 0.10)           | 0.239 |

Compared using fractional regression. All statistical tests are two-sided, and presented P-values have not been adjusted for multiple comparisons.

\*Adjusted for gestational age exact infant age in days at time of infant blood sampling and saliva sampling, infant sex, and randomised trial arm.

**Supplementary Table 7. CRP and IL-6 in HEU and HIV-unexposed children at 1 month of age according to infant sex.**

|                              | Sex    | HIV-exposed uninfected,<br>mean (SD) | HIV-unexposed,<br>mean (SD) | Adjusted relative difference* | <i>P</i> |
|------------------------------|--------|--------------------------------------|-----------------------------|-------------------------------|----------|
| C-reactive protein<br>(mg/L) | Female | 2.79 (8.2)                           | 3.32 (8.9)                  | 0.65 (0.27, 1.53)             | 0.316    |
|                              | Male   | 2.05 (7.0)                           | 4.94 (16.5)                 | 0.45 (0.19, 1.01)             | 0.053    |
| Interleukin-6<br>(pg/mL)     | Female | 43.76 (79.1)                         | 30.23 (52.8)                | 1.74 (0.51, 5.92)             | 0.369    |
|                              | Male   | 24.40 (49.26)                        | 36.50 (57.8)                | 0.83 (0.28, 2.49)             | 0.738    |

Compared using Tobit regression. All statistical tests are two-sided, and presented P-values have not been adjusted for multiple comparisons.

\*Adjusted for exact age at time of blood collection and randomised trial arm.

**Supplementary Table 8. Differences between proportions of monocyte and CD8+ T-cell subsets in HEU and HIV-unexposed children at 1 month of age according to infant sex.**

|                                                               |                                        | Female                |          | Male                  |          |
|---------------------------------------------------------------|----------------------------------------|-----------------------|----------|-----------------------|----------|
|                                                               | Cell subset                            | Adjusted coefficient* | <i>P</i> | Adjusted coefficient* | <i>P</i> |
|                                                               | Naïve                                  | -0.29 (-0.62, 0.04)   | 0.089    | -0.45 (-0.79, -0.12)  | 0.009    |
| CD8 <sup>+</sup> differentiation panel <sup>††</sup>          | Central memory                         | 0.19 (-0.09, 0.47)    | 0.186    | 0.31 (0.03, 0.58)     | 0.030    |
|                                                               | Effector memory                        | 0.37 (0.05, 0.74)     | 0.047    | 0.58 (0.21, 0.95)     | 0.002    |
|                                                               | TEMRA                                  | 0.23 (-0.13, 0.59)    | 0.232    | 0.33 (-0.07, 0.74)    | 0.108    |
| CD8 <sup>+</sup> senescence/ exhaustion panel <sup>†††</sup>  | CD28 <sup>+</sup> /CD57 <sup>-</sup>   | -0.15 (-0.45, 0.15)   | 0.338    | -0.46 (-0.78, -0.13)  | 0.006    |
|                                                               | CD28 <sup>-</sup> /CD57 <sup>+</sup>   | 0.07 (-0.26, 0.40)    | 0.690    | 0.56 (0.18, 0.94)     | 0.004    |
|                                                               | PD-1 <sup>+</sup>                      | 0.09 (-0.23, 0.42)    | 0.581    | 0.41 (0.05, 0.76)     | 0.024    |
| CD8 <sup>+</sup> activation/ proliferation panel <sup>†</sup> | CD38 <sup>+</sup> /HLA-DR <sup>+</sup> | 0.36 (0.08, 0.64)     | 0.011    | 0.45 (0.12, 0.77)     | 0.007    |
|                                                               | Ki67 <sup>+</sup>                      | 0.22 (-0.09, 0.52)    | 0.166    | 0.43 (0.17, 0.69)     | 0.001    |
| Monocyte panel <sup>**</sup>                                  | Classical                              | -0.09 (-0.25, 0.07)   | 0.288    | -0.16 (-0.31, -0.01)  | 0.040    |
|                                                               | Intermediate                           | 0.10 (-0.06, 0.26)    | 0.220    | -0.02 (-0.15, 0.12)   | 0.815    |
|                                                               | Non-classical                          | 0.04 (-0.16, 0.23)    | 0.702    | 0.19 (0.00, 0.38)     | 0.050    |

Compared using fractional regression. All statistical tests are two-sided, and presented P-values have not been adjusted for multiple comparisons.

\*Adjusted for exact age at time of blood collection. Classical monocytes: CD3<sup>-</sup>/CD19<sup>-</sup>/CD20<sup>-</sup>/CD56<sup>-</sup>/HL-DR<sup>+</sup>/CD14<sup>++</sup>/CD16<sup>-</sup>; intermediate monocytes: CD3<sup>-</sup>/CD19<sup>-</sup>/CD20<sup>-</sup>/CD56<sup>-</sup>/HLADR<sup>+</sup>/CD14<sup>++</sup>/CD16<sup>+</sup>; non-classical monocytes: CD3<sup>-</sup>/CD19<sup>-</sup>/CD20<sup>-</sup>/CD56<sup>-</sup>/HLADR<sup>+</sup>/CD14<sup>+</sup>/CD16<sup>++</sup>. \*Female HEU N=50, HIV-unexposed=47; male, HEU N=51, HIV-unexposed N=43. <sup>†</sup>Females HEU N=54, HIV-unexposed N=47; males, HEU N=54, HIV-unexposed N=44. <sup>††</sup>Female HEU N=48, HIV-unexposed=40; male, HEU N=45, HIV-unexposed N=39. <sup>†††</sup>Female HEU N=54, HIV-unexposed=47; male, HEU N=54, HIV-unexposed N=44. TEMRA: terminally-differentiated effector memory.

**Supplementary Table 9. Difference in T-cell and monocyte phenotypes in HIV-exposed uninfected children at 1 month of age with and without third trimester CMV exposure by infant sex.**

|                                                                | Male                          |          | Female                        |          |
|----------------------------------------------------------------|-------------------------------|----------|-------------------------------|----------|
|                                                                | Adjusted* coefficient (95%CI) | <i>P</i> | Adjusted* coefficient (95%CI) | <i>P</i> |
| Naïve CD8 <sup>+</sup> T-cells                                 | -0.67 (-1.22, -0.11)          | 0.019    | -0.51, -1.18, 0.17)           | 0.142    |
| Central memory CD8 <sup>+</sup> T-cells                        | 0.31 (-0.08, 0.70)            | 0.123    | 0.18 (-0.33, 0.69)            | 0.487    |
| Effector memory CD8 <sup>+</sup> T-cells                       | 0.58 (0.02, 1.14)             | 0.041    | 0.73 (0.05, 1.40)             | 0.034    |
| TEMRA CD8 <sup>+</sup> T-cells                                 | 0.69 (0.05, 1.33)             | 0.035    | 0.64 (0.20, 1.07)             | 0.004    |
| CD28 <sup>+</sup> CD57 <sup>-</sup> CD8 <sup>+</sup> T-cells   | -0.66 (-1.11, -0.21)          | 0.004    | -0.49 (-1.13, 0.14)           | 0.128    |
| CD28 <sup>-</sup> CD57 <sup>+</sup> CD8 <sup>+</sup> T-cells   | 0.95 (0.42, 1.47)             | <0.001   | 0.71 (0.17, 1.26)             | 0.010    |
| PD-1 <sup>+</sup> CD8 <sup>+</sup> T-cells                     | 0.73 (0.22, 1.25)             | 0.005    | 0.59 (0.18, 1.00)             | 0.005    |
| CD38 <sup>+</sup> HLA-DR <sup>+</sup> CD8 <sup>+</sup> T-cells | 0.43 (0.04, 0.83)             | 0.031    | 0.19 (-0.42, 0.79)            | 0.546    |
| Ki67 <sup>+</sup> CD8 <sup>+</sup> T-cells                     | 0.05 (-0.43, 0.52)            | 0.847    | 0.24 (-0.44, 0.92)            | 0.492    |
| Classical monocytes                                            | 0.13 (-0.12, 0.38)            | 0.310    | -0.22 (-0.46, 0.03)           | 0.079    |
| Intermediate monocytes                                         | 0.30 (0.01, 0.58)             | 0.041    | 0.25 (-0.13, 0.62)            | 0.198    |
| Non-classical monocytes                                        | -0.33 (-0.57, -0.09)          | 0.006    | 0.08 (-0.18, 0.35)            | 0.545    |

Compared using fractional regression. All statistical tests are two-sided, and presented P-values have not been adjusted for multiple comparisons.

\*Adjusted for maternal HIV viral load, gestational age at time of maternal blood sampling, exact infant age in days at time of infant blood sampling, randomised trial arm.

**Supplementary Table 10. Baseline characteristics of children meeting the selection criteria for the immunology sub-study.**

| <b>Baseline characteristics<sup>1</sup></b> | <b>HIV-exposed</b> | <b>HIV-unexposed</b> | <b><i>P</i></b> |
|---------------------------------------------|--------------------|----------------------|-----------------|
| Mothers [N]                                 | 141                | 142                  |                 |
| Infants [N]                                 | 143                | 143                  |                 |
| <b>Trial arm<sup>2</sup></b>                |                    |                      | <b>1.00</b>     |
| SOC                                         | 31/143 (22%)       | 31/143 (22%)         |                 |
| IYCF                                        | 44/143 (31%)       | 44/143 (31%)         |                 |
| WASH                                        | 35/143 (24%)       | 35/143 (24%)         |                 |
| IYCF+WASH                                   | 33/143 (23%)       | 33/143 (23%)         |                 |
| <b>Household characteristics</b>            |                    |                      |                 |
| Size; median (IQR)                          | 4 (3, 5)           | 4 (3, 6)             | 0.07            |
| Wealth quintile <sup>3</sup> :              |                    |                      | 0.48            |
| Lowest                                      | 34/140 (24%)       | 26/142 (18%)         |                 |
| Second                                      | 31/140 (22%)       | 30/142 (21%)         |                 |
| Middle                                      | 34/140 (24%)       | 36/142 (25%)         |                 |
| Fourth                                      | 19/140 (14%)       | 31/142 (22%)         |                 |
| Highest                                     | 22/140 (16%)       | 19/142 (14%)         |                 |
| <b>Maternal characteristics</b>             |                    |                      |                 |
| Age, years; mean (SD)                       | 30.1 (6.5)         | 27.3 (6.7)           | <0.001          |
| Height, cm; mean (SD)                       | 159.8 (5.5)        | 160.9 (5.6)          | 0.11            |
| MUAC, cm; mean (SD)                         | 26.2 (2.8)         | 27.2 (3.1)           | 0.008           |
| Completed schooling, years; mean (SD)       | 9.0 (2.2)          | 9.6 (1.5)            | 0.03            |



|                                                          |               |               |       |
|----------------------------------------------------------|---------------|---------------|-------|
| Parity; median (IQR)                                     | 2 (1, 3)      | 2 (1, 3)      | 0.13  |
| Married                                                  | 123/134 (92%) | 133/140 (95%) | 0.36  |
| Employed                                                 | 12/138 (9%)   | 15/142 (11%)  | 0.59  |
| Religion:                                                |               |               | 0.78  |
| Apostolic                                                | 68/143 (48%)  | 65/143 (45%)  |       |
| Other Christian religions                                | 61/143 (43%)  | 67/143 (47%)  |       |
| Other non-Christian religions                            | 14/143 (10%)  | 11/143 (8%)   |       |
| HIV disease severity and treatment:                      |               |               |       |
| CD4 count in pregnancy, cells/uL; mean (SD) <sup>4</sup> | 471.4 (226)   | N/A           |       |
| CD4 count <200 cells/uL                                  | 16/135 (12%)  | N/A           |       |
| Co-trimoxazole prophylaxis during pregnancy <sup>5</sup> | 100/141 (71%) | N/A           |       |
| Antiretroviral therapy during pregnancy <sup>6</sup>     | 136/141 (96%) | N/A           |       |
| Tenofovir disoproxil fumarate-based ART regimen          | 117/136 (86%) | N/A           |       |
| Zidovudine-based ART regimen                             | 6/136 (4%)    | N/A           |       |
| Other/unknown regimen <sup>7</sup>                       | 13/136 (10%)  | N/A           |       |
| <b>Infant characteristics</b>                            |               |               |       |
| Female                                                   | 74/143 (52%)  | 74/143 (52%)  | 1.00  |
| Birth weight, kg; mean (SD)                              | 3.02 (0.50)   | 3.17 (0.49)   | 0.005 |
| Birth weight <2500 g                                     | 16/140 (11%)  | 12/138 (9%)   | 0.46  |
| Institutional delivery                                   | 119/139 (86%) | 126/141 (89%) | 0.33  |
| Vaginal delivery                                         | 131/141 (93%) | 135/142 (95%) | 0.45  |

<sup>1</sup> Baseline for mothers was 2 weeks after consent (~14 weeks gestation). Baseline for infants was at birth. Values are %, unless stated.

<sup>2</sup> SOC = standard of care; IYCF = infant and young child feeding; WASH = water and sanitation/hygiene.

<sup>3</sup> Wealth index constructed as described in (1).

<sup>4</sup> CD<sub>4</sub> count at baseline visit, or at 32 gestational week visit if no baseline result.

<sup>5</sup> Documented exposure to co-trimoxazole during pregnancy.

<sup>6</sup> Documented exposure to antiretroviral therapy during pregnancy.

<sup>7</sup> Includes non-tenofovir- or zidovudine-based regimens, use of both tenofovir and zidovudine during pregnancy (including switching regimens), or undocumented antiretroviral therapy regimen.

SD: standard deviation; IQR: interquartile range; MUAC: mid-upper arm circumference.

**Supplementary Table 11. Flow cytometry antibodies.**

| Target                                              | Fluorochrome | Clone                     | Manufacturer   | Catalogue number | Volume/tube |
|-----------------------------------------------------|--------------|---------------------------|----------------|------------------|-------------|
| CD3                                                 | FITC         | HIT3a                     | BD Biosciences | 555339           | 20ul        |
| CD4                                                 | APC-H7       | SK1                       | BD Biosciences | 641398           | 4ul         |
| CD8                                                 | PECy7        | SK3                       | BD Biosciences | 641398           | 1ul         |
| CD38                                                | PE           | HIT2                      | BD Biosciences | 555460           | 20ul        |
| Ki67                                                | PerCP-Cy5.5  | B56                       | BD Biosciences | 561284           | 5ul         |
| HLA-DR                                              | APC          | L243 (G46-6)              | BD Biosciences | 559866           | 20ul        |
| CD27                                                | PE           | MT-271                    | BD Biosciences | 555441           | 20ul        |
| CD45RA                                              | APC          | HI100                     | BD Biosciences | 550855           | 10ul        |
| CD31                                                | PerCP-Cy5.5  | WM59                      | Biologend      | 303132           | 5ul         |
| CD57                                                | PE           | NK-1                      | BD Biosciences | 560844           | 0.5ul       |
| CD28                                                | APC          | CD28.2                    | BD Biosciences | 559770           | 20ul        |
| PD-1                                                | PerCP-Cy5.5  | EH12.1                    | BD Biosciences | 561273           | 5ul         |
| Anti-human lineage cocktail (CD3, CD19, CD20, CD56) | APC          | UCHT1, HIB19, 2H7, 5.1Hu1 | Biologend      | 363601           | 5ul         |
| CD66b                                               | APC          | G10F5                     | Biologend      | 305118           | 2ul         |
| CD16                                                | APCCy7       | 3G8                       | Biologend      | 302018           | 5ul         |
| CD14                                                | PE           | HCD14                     | Biologend      | 325606           | 2.5ul       |
| HLA-DR                                              | PE-Cy7       | L243 (G46-6)              | BD Biosciences | 560651           | 5ul         |
| CD86                                                | FITC         | BU63                      | Biologend      | 374204           | 5ul         |
| CD40                                                | PerCP-Cy5.5  | 5C3                       | Biologend      | 334316           | 2.5ul       |

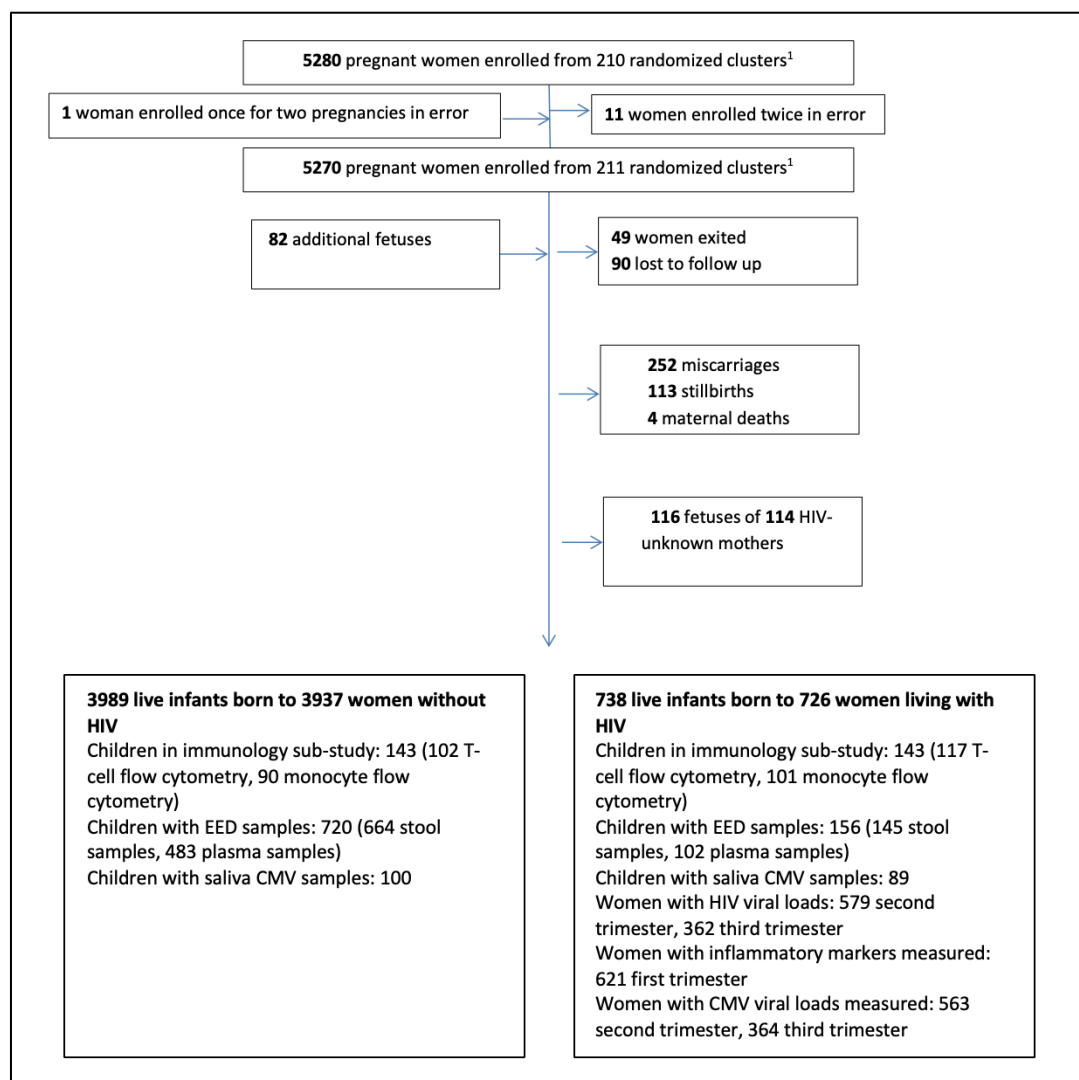

**Supplementary Figure 1. Consort diagram showing the flow of participants through the SHINE trial.**

<sup>1</sup>212 clusters were randomly assigned, 53 in each of the four trial groups. After randomisation, one cluster was excluded because it was in an urban area, one was excluded because the village health worker covering it mainly had clients outside the study area, and two more were

merged on the basis of subsequent data for village health worker coverage. Three new cluster designations were created because of anomalies in the original mapping. For two of these cluster, the trial group was clear; the third contained areas that were in two trial groups, and was assigned to the under-represented group, resulting in 53 clusters in each group. All these changes occurred before enrolment began. When enrolment was completed, however, no women were enrolled in one cluster in the SOC group and thus 211 clusters were available for analysis.

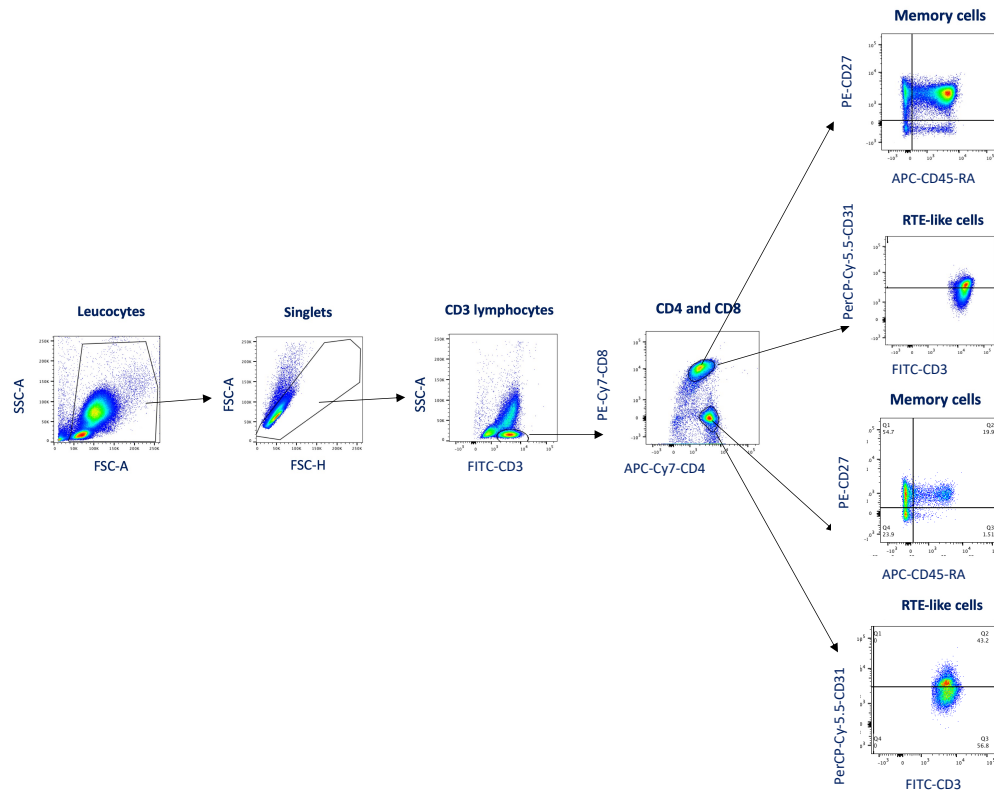

**Supplementary Figure 2. Flow cytometry gating strategy for differentiation panel.**

Sequential gating of cells to identify leucocytes, singlets, CD3<sup>+</sup> T-cells, CD4<sup>+</sup> T-cells and CD8<sup>+</sup> T-cells, and immunophenotyping for naïve (CD45RA<sup>+</sup>/CD27<sup>+</sup>), central memory (CD45RA<sup>-</sup>/CD27<sup>+</sup>), effector memory (CD45RA<sup>-</sup>/CD27<sup>-</sup>), and terminally differentiated effector memory (TEMRA) (CD45RA<sup>+</sup>/CD27<sup>-</sup>) cells, and CD31<sup>+</sup> recent thymic emigrant-like cells. RTE: recent thymic emigrant; SSC: side-scatter; FSC: forward-scatter.

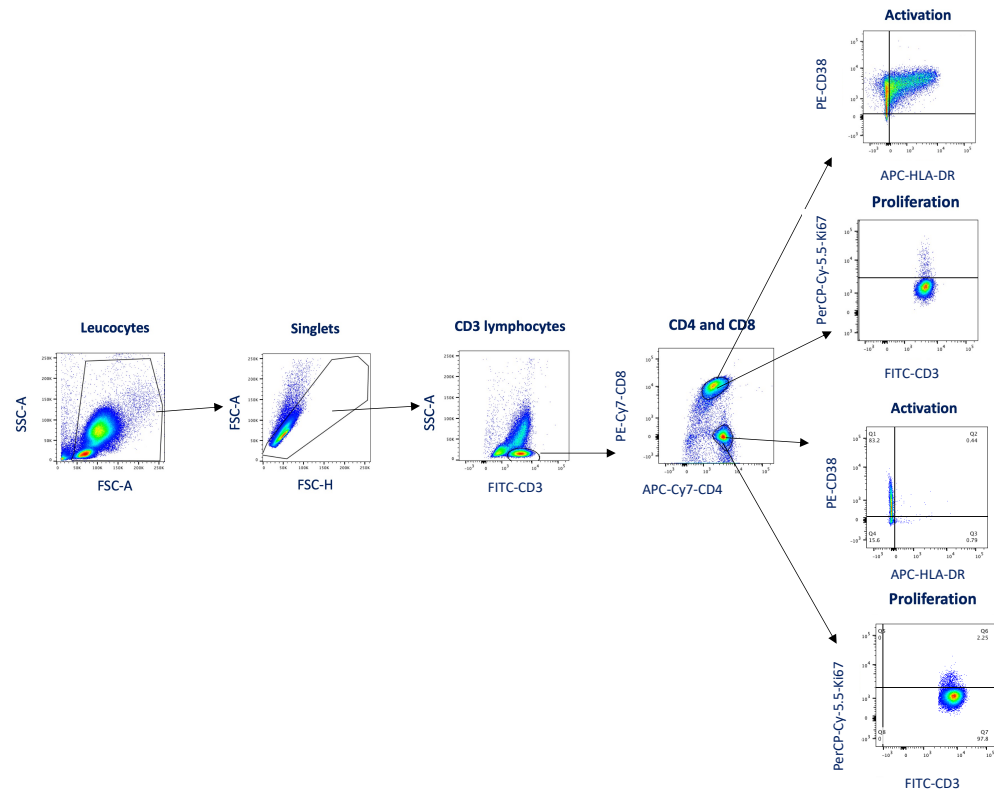

**Supplementary Figure 3. Flow cytometry gating strategy for T-cell activation panel.**

Sequential gating of cells to identify leucocytes, singlets, CD3<sup>+</sup> T-cells, CD4<sup>+</sup> T-cells and CD8<sup>+</sup> T-cells, and immunophenotyping for activation (CD38<sup>+</sup>/HLA-DR<sup>+</sup>) and proliferating (Ki67<sup>+</sup>) cells. SSC: side-scatter; FSC: forward-scatter.

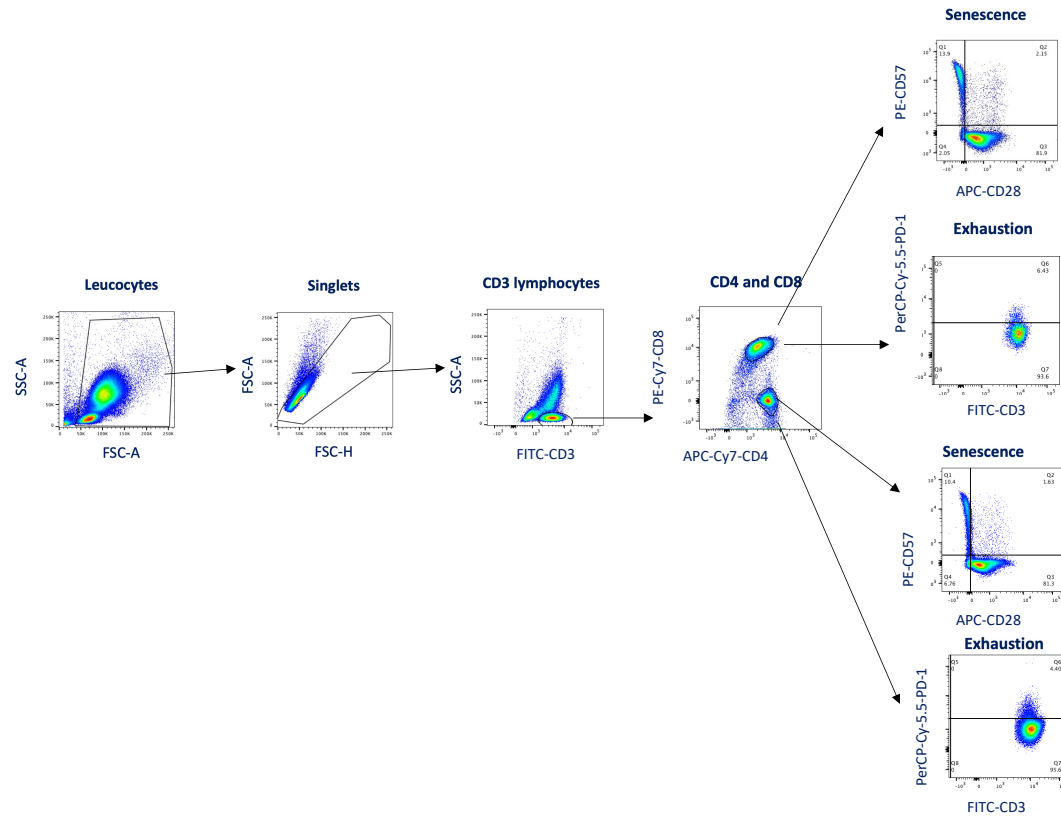

**Supplementary Figure 4. Flow cytometry gating strategy for T-cell senescence/exhaustion panel.**

Sequential gating of cells to identify leucocytes, singlets, CD3<sup>+</sup> T-cells, CD4<sup>+</sup> T-cells and CD8<sup>+</sup> T-cells, and immunophenotyping for non-senescent (CD28<sup>+</sup>/CD57<sup>-</sup>), senescent (CD28<sup>-</sup>/CD57<sup>+</sup>), and exhausted (PD-1<sup>+</sup>) cells. SSC: side-scatter; FSC: forward-scatter.



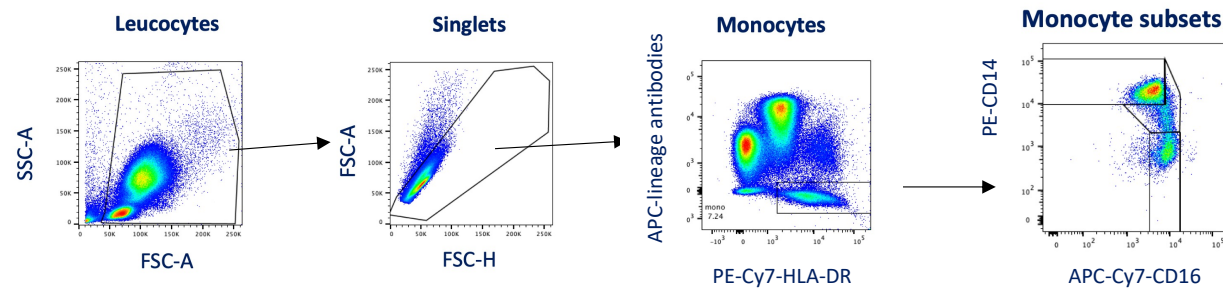

### Supplementary Figure 5. Flow cytometry gating strategy for monocyte panel.

Sequential gating of cells to identify leucocytes, singlets and monocytes, and immunophenotyping for CD14<sup>++</sup>/CD16<sup>-</sup> classical monocytes, CD14<sup>++</sup>/CD16<sup>+</sup> intermediate monocytes and CD14<sup>+</sup>/CD16<sup>++</sup> non-classical monocytes. SSC: side-scatter; FSC: forward-scatter.

### Supplementary references

1. B. Chasekwa *et al.*, Measuring wealth in rural communities: Lessons from the Sanitation, Hygiene, Infant Nutrition Efficacy (SHINE) trial. *PLoS One* **13**, e0199393 (2018).
